# Supplementary material
Source: PubMed Central journal article supplement (PMC4379715)
Supplement: NIHMS618007-supplement-01.pdf [file NIHMS618007-supplement-01.pdf]

## Supplemental Figure 1

### (A) 5 ms ETD only

| ID/Gene                                                                                                                                             | Length | Mass  | Mass Diff. | PPM Diff. | C Ions | Z Ions | Total Ions | PDE Score | E-Value  |
|-----------------------------------------------------------------------------------------------------------------------------------------------------|--------|-------|------------|-----------|--------|--------|------------|-----------|----------|
| ▶ >sp P68082 MYG_HORSE Myoglobin OS=Equus caballus GN=MB PE=1 SV=2, ; . (Type: <i>basic</i> , Signal Peptide: <i>false</i> , Propep: <i>false</i> ) |        |       |            |           |        |        |            |           |          |
| 1                                                                                                                                                   | 1      | 16941 | 12.9262    | 762.433   | 56     | 44     | 100        | 121       | 6.42E-14 |

```

1  G L S D G E W Q Q V L N V W G K V E A D I A G H G Q E V L I z124
31 R L F T T G H P E T T L E K F D K F K H L K T T E A E M K A S E D z94
61 L K K H G T V V L T A L G G I L K K K G H H E A E L K P L A z64
91 Q S H A T K H K I P I K Y L E F I S D A I I H V L H S K H P z34
121 G D F G A D A Q G A M T K A L E L F R N D I A A K Y K E L G z4
151 F Q G z1
  
```

### (B) 5 ms ETD + 20 ms IIPT

| ID/Gene                                                                                                                                             | Length | Mass  | Mass Diff. | PPM Diff. | C Ions | Z Ions | Total Ions | PDE Score | E-Value  |
|-----------------------------------------------------------------------------------------------------------------------------------------------------|--------|-------|------------|-----------|--------|--------|------------|-----------|----------|
| ▶ >sp P68082 MYG_HORSE Myoglobin OS=Equus caballus GN=MB PE=1 SV=2, ; . (Type: <i>basic</i> , Signal Peptide: <i>false</i> , Propep: <i>false</i> ) |        |       |            |           |        |        |            |           |          |
| 1                                                                                                                                                   | 1      | 16941 | 12.9262    | 762.433   | 67     | 64     | 131        | 124       | 2.12E-14 |

```

1  G L S D G E W Q Q V L N V W G K V E A D I A G H G Q E V L I z124
31 R L F T T G H P E T T L E K F D K F K H L K T T E A E M K A S E D z94
61 L K K H G T V V L T A L G G I L K K K G H H E A E L K P L A z64
91 Q S H A T K H K I P I K Y L E F I S D A I I H V L H S K H P z34
121 G D F G A D A Q G A M T K A L E L F R N D I A A K Y K E L G z4
151 F Q G z1
  
```

### (C) 5 ms ETD + 40 ms IIPT

| ID/Gene                                                                                                                                             | Length | Mass  | Mass Diff. | PPM Diff. | C Ions | Z Ions | Total Ions | PDE Score | E-Value  |
|-----------------------------------------------------------------------------------------------------------------------------------------------------|--------|-------|------------|-----------|--------|--------|------------|-----------|----------|
| ▶ >sp P68082 MYG_HORSE Myoglobin OS=Equus caballus GN=MB PE=1 SV=2, ; . (Type: <i>basic</i> , Signal Peptide: <i>false</i> , Propep: <i>false</i> ) |        |       |            |           |        |        |            |           |          |
| 1                                                                                                                                                   | 1      | 16941 | 12.9262    | 762.433   | 77     | 73     | 150        | 145       | 4.01E-24 |

```

1  G L S D G E W Q Q V L N V W G K V E A D I A G H G Q E V L I z124
31 R L F T T G H P E T T L E K F D K F K H L K T T E A E M K A S E D z94
61 L K K H G T V V L T A L G G I L K K K G H H E A E L K P L A z64
91 Q S H A T K H K I P I K Y L E F I S D A I I H V L H S K H P z34
121 G D F G A D A Q G A M T K A L E L F R N D I A A K Y K E L G z4
151 F Q G z1
  
```

# Supplemental Figure 2

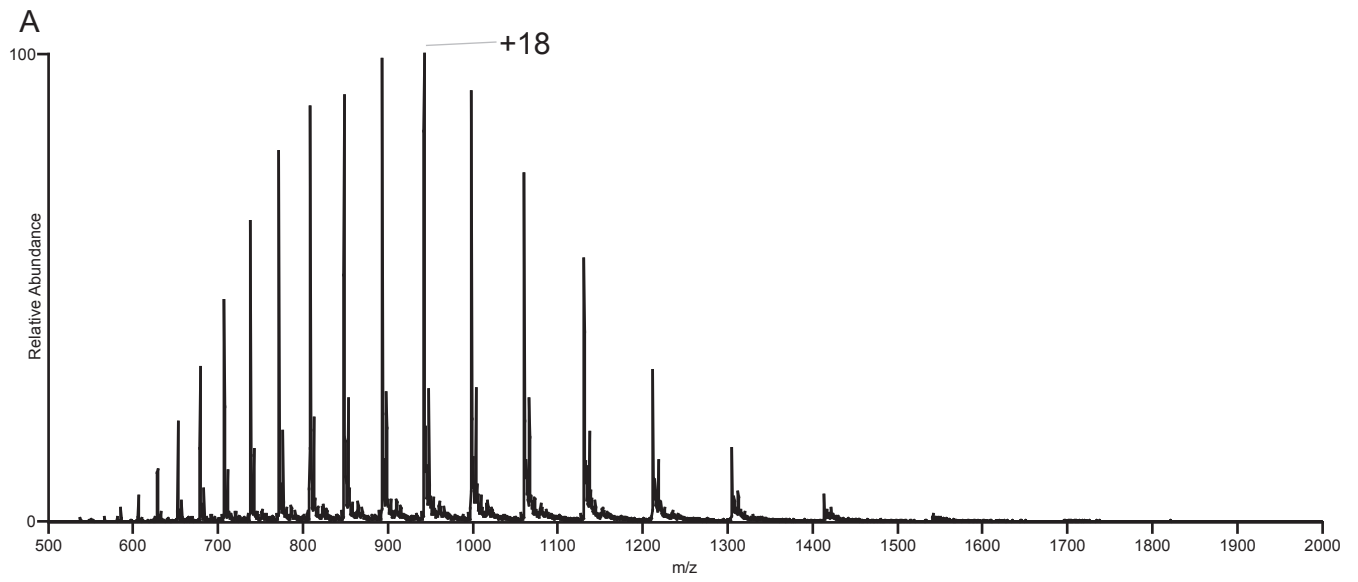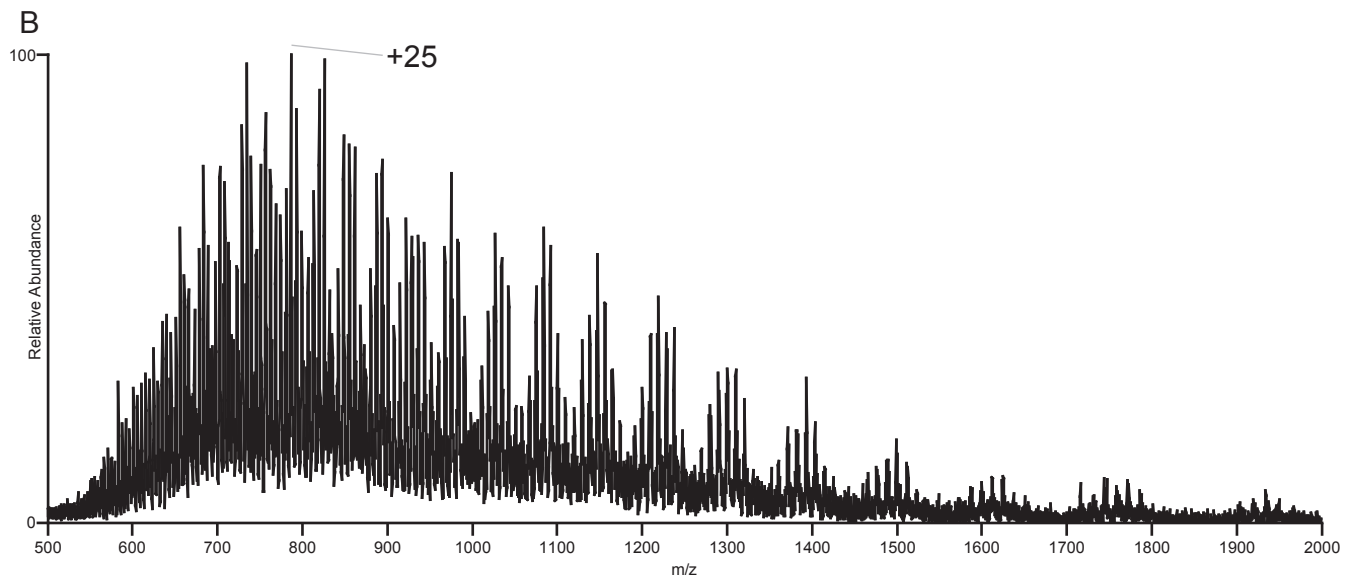

## Supplemental Figure Legends

**Supplemental Figure 1 – Apomyoglobin sequence coverage determined by analysis of ETD and ETD/IIPT MS/MS spectra with ProSight PC™ software.** (A) Sequence coverage from 5 msec of ETD only. (B) Sequence coverage from 5 msec of ETD & 20 msec of IIPT. (C) Sequence coverage from 5 msec of ETD & 40 msec of IIPT. Searches were performed by using ProSightPC 3.0 (Thermo Fisher Scientific). Fragment mass tolerance was set to 2 Da.

**Supplemental Figure 2 – Electrospray Ionization mass spectra of unmodified and modified apomyoglobin.** Distribution of charge states observed for (A) apomyoglobin, and (B) apomyoglobin derivatized with aminoethylbenzimidazole.
